# Supplementary material for: Short-Term Resilience of Soil Microbial Communities and Functions Following Severe Environmental Changes
Source: MDPI journal article supplement (doi:10.3390/agriculture12020268), 2022-02-14
Supplement: s1 [file s1]

Archive with 2 entries (2 files):
- Supplementary figures_S1 and S2.pdf
- Table S1_correlations.xlsx
