# Supplementary material for: Short-Term Resilience of Soil Microbial Communities and Functions Following Severe Environmental Changes
Source: MDPI journal article supplement (doi:10.3390/agriculture12020268), 2022-02-14
Supplement: s1 [file s1 › Supplementary figures_S1 and S2.pdf]

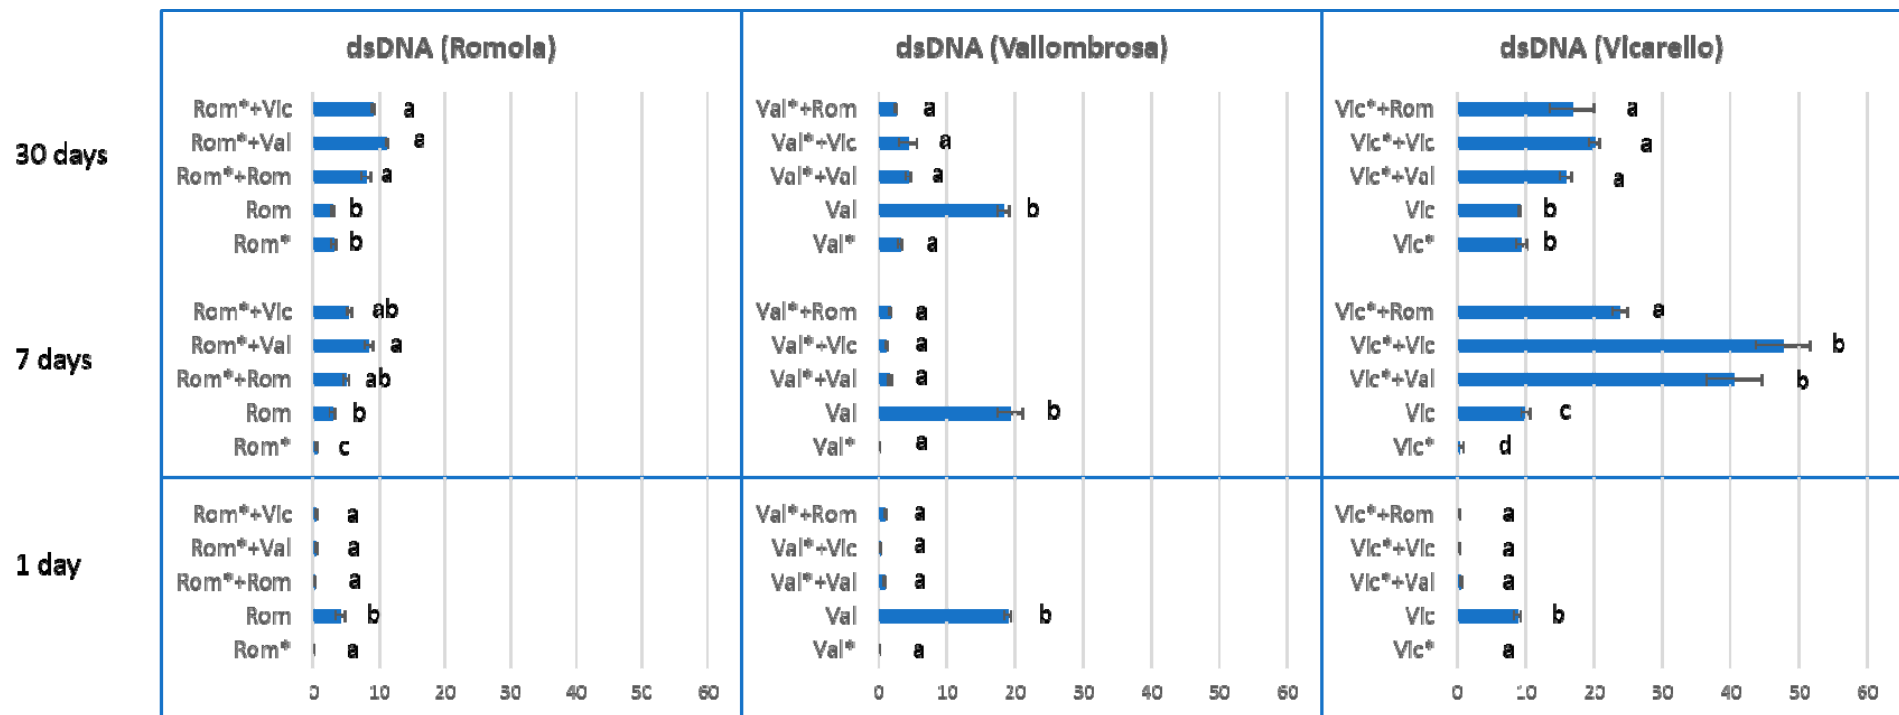

**Figure S1.** dsDNA content (expressed as mg/kg) of Vallombrosa, Vicarello and Romola control and inoculated soils. The numbers 1, 7 and 30 indicate the time of sampling (incubation). At each sampling time, different letters indicate a significant ( $P < 0.05$ ) difference among means ( $n = 3$ ).

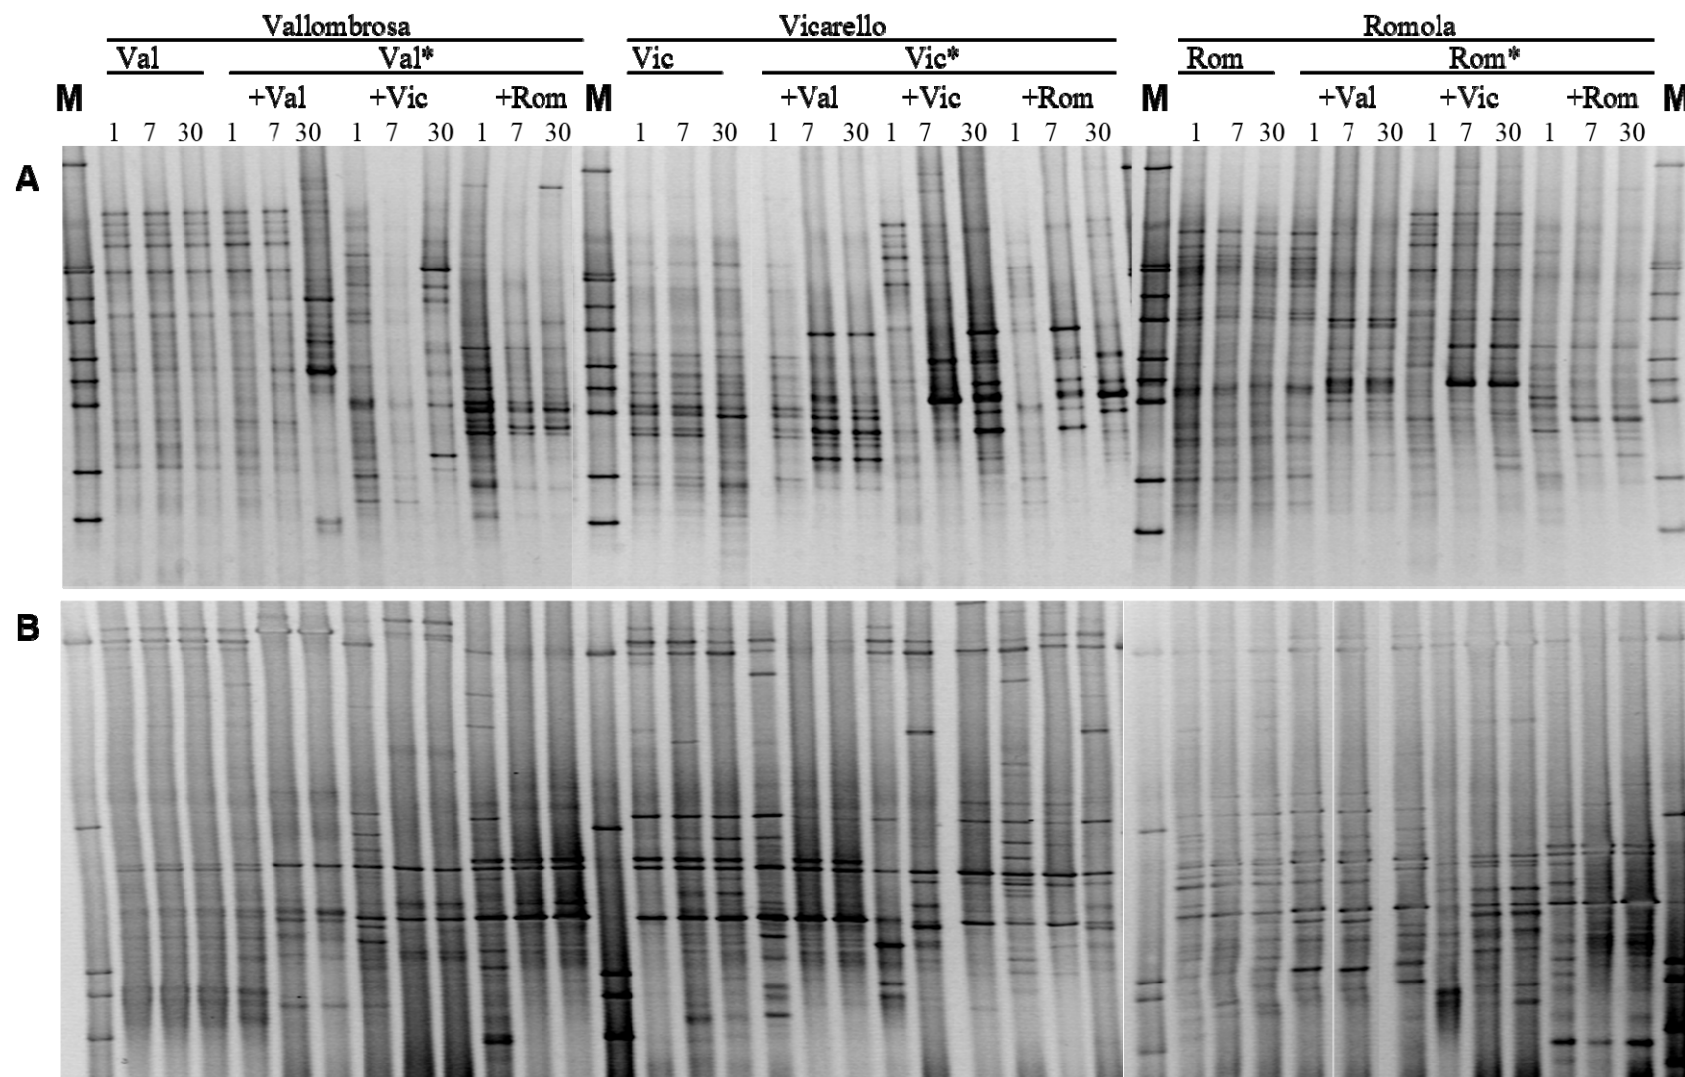

**Figure S2.** DGGE profiles of 16S (A) and 18S (B) rRNA genes PCR products obtained from Vallombrosa, Vicarello and Romola control and inoculated soils. Sterilized non inoculated samples have not been taken into consideration for PCR-DGGE analyses. The letter M on the gel images indicates the marker used for normalization of bands; the numbers 1, 7 and 30 indicate the time of incubation (days).
