# Supplementary material for: Short-Term Resilience of Soil Microbial Communities and Functions Following Severe Environmental Changes
Source: MDPI journal article supplement (doi:10.3390/agriculture12020268), 2022-02-14
Supplement: s1 [file s1 › Table S1_correlations.xlsx]

## Sheet: Pearson correlation
	Alk-P	Acid-P	Beta-Glu	Protease	Urease	dsDNA	ATP	Ccum	AWCD_FF	s_FF	Area_FF	CV_FF	AWCD_B	s_B	Area_B	CV_B	H'_B	Simpson_B	Richness_B	H'_FF	Simpson_FF	Richness_FF	Ammonification	Amines_B	Aminoacids_B	Carbohydrates_B	Carboxylic acids_B	Phenolic comp_B	Polymers_B	Amines_F	Aminoacids_F	Carbohydrates_F	Carboxylic acids_F	Nucleotides_F	Polymers_F
Alk-P		0.98178	0.0683	0.003628	0.0073811	8.9469e-14	7.0227e-22	1.4786e-06	0.00010618	3.0768e-07	7.8434e-05	0.014726	0.00019662	9.2492e-08	0.0086127	2.1104e-09	0.038228	0.0048456	0.91168	0.0003791	0.011122	0.0041842	0.13899	0.0093528	0.00071854	0.011102	0.0030355	4.727e-05	0.00023509	0.11881	0.00051689	0.0002553	0.00092638	0.05477	0.0025379
Acid-P	0.001977		2.1461e-29	0.12279	0.29921	0.76824	0.13202	0.028459	0.18593	0.058157	0.029667	0.20873	5.5475e-06	0.025169	2.2159e-08	0.814	0.054954	0.052811	0.0053957	0.82922	4.2207e-05	0.15075	3.5758e-30	0.0017763	6.6563e-05	0.004946	3.6974e-05	0.021598	2.4406e-05	0.50907	0.17924	0.83455	0.24174	0.26409	0.59451
Beta-Glu	0.1568	0.78283		0.44045	0.36926	0.40191	0.12749	0.022388	0.088288	0.002573	0.089478	0.75707	7.362e-08	0.043673	4.3243e-08	0.29537	0.70537	0.15114	0.46048	0.30915	0.0012467	0.017557	1.3504e-31	6.2657e-05	3.0828e-06	0.0022528	1.2481e-06	0.0001239	1.0853e-05	0.49335	0.043521	0.10912	0.22386	0.28107	0.30205
Protease	0.24781	0.13297	-0.066691		2.8118e-07	0.080405	0.018531	0.28847	0.26755	0.68539	0.3753	0.041979	0.51231	0.029704	0.26184	0.15098	8.5228e-05	0.59171	0.0002061	5.2361e-07	0.33622	8.2685e-08	0.097309	0.78309	0.19708	0.5672	0.95389	0.52255	0.21083	0.14282	0.24668	0.57369	0.28142	0.17773	0.53686
Urease	0.22879	0.089667	-0.077592	0.42339		7.895e-07	4.753e-05	0.16758	0.01649	0.79724	0.039123	0.28512	0.0335	0.005628	0.25682	0.14849	0.021773	0.04605	0.26398	8.6095e-05	0.05794	0.00037591	0.69555	0.13659	0.093422	0.045761	0.020235	0.20056	0.11986	0.033978	0.023383	0.037502	0.038124	0.014185	0.29679
dsDNA	0.58355	-0.0255	-0.07245	0.15045	0.40857		6.0978e-53	1.0164e-11	0.015247	1.1704e-07	9.1938e-06	0.14204	0.0046306	3.3672e-13	0.081548	8.8726e-08	0.040416	0.016441	0.4652	0.0012723	0.0069555	0.035818	0.77688	0.063844	0.02988	0.0092055	0.0090959	0.31778	0.00090524	0.1042	0.15123	0.013023	0.034	0.1067	0.13124
ATP	0.70674	-0.1298	-0.13133	0.20171	0.34139	0.90953		3.3904e-21	0.0019183	1.822e-09	0.00016833	0.36925	0.0113	2.1127e-16	0.21167	1.185e-09	0.02891	0.0034129	0.69756	0.00012397	0.003578	0.0038466	0.50975	0.061748	0.046031	0.018043	0.023746	0.23358	0.0010569	0.02367	0.020499	0.0022587	0.0035863	0.021191	0.075096
Ccum	0.3992	-0.18793	-0.19574	-0.091675	0.11901	0.54131	0.69833		0.061447	6.4357e-18	0.026265	0.0044358	0.59913	1.9898e-13	0.24719	4.3268e-11	0.87688	0.042357	0.33708	0.046211	0.092882	0.070112	0.083745	0.2792	0.96441	0.63812	0.46584	0.81592	0.05057	0.0006891	0.023784	0.073094	0.025769	0.035798	0.35826
AWCD_FF	0.32624	0.1141	0.14672	0.095737	0.20532	0.20771	0.26375	0.16081		0.6084	1.2538e-26	0.00097842	5.3854e-28	0.19287	1.9969e-25	3.5093e-13	1.0513e-08	1.6266e-07	0.00036597	9.8816e-12	6.3424e-09	1.1296e-07	0.07358	1.0262e-11	1.2108e-16	7.6133e-13	4.9912e-21	2.6746e-09	3.9725e-21	5.4957e-20	5.6599e-44	2.7177e-51	2.3056e-54	1.055e-13	4.822e-15
s_FF	-0.42213	-0.16287	-0.25653	0.035051	0.022233	-0.43545	-0.48706	-0.65354	-0.044321		0.18921	1.3066e-08	0.14984	4.7317e-06	0.01627	5.6187e-06	0.88061	0.61901	0.92517	0.21045	0.159	0.35465	0.0064196	0.0065267	0.14993	0.65572	0.2788	0.34275	0.0044128	0.15299	0.5156	0.82696	0.63803	0.88642	0.84
Area_FF	0.33204	0.18654	0.14618	-0.076619	0.17712	0.37014	0.31717	0.19057	0.7579	-0.11326		1.7035e-08	3.9156e-14	0.046881	3.7431e-22	1.0067e-10	0.0020874	4.4396e-05	0.088224	0.0013176	0.00036517	0.049378	0.29522	1.4385e-05	2.6497e-09	1.0289e-07	1.0826e-13	2.0377e-05	4.4015e-10	6.8475e-11	7.6513e-16	2.6157e-21	2.0181e-17	7.1892e-06	5.6164e-12
CV_FF	0.20876	-0.10848	-0.026768	-0.17466	0.092313	0.12656	0.077592	-0.24257	0.27961	0.46369	0.46041		0.010984	0.65777	0.026624	0.050672	0.76713	0.10764	0.10368	0.15163	0.28702	0.07163	0.52788	0.30559	0.13972	0.024849	0.0076533	0.00064467	0.40323	0.30535	0.022814	0.00064475	0.024692	0.079423	0.0016822
AWCD_B	0.31405	0.37846	0.44164	0.056665	0.18246	0.24144	0.21664	0.04547	0.77061	-0.12416	0.59034	0.21747		0.66101	3.654e-45	1.1069e-08	3.4413e-07	5.263e-06	0.00023539	1.8602e-05	9.4831e-08	0.0093338	1.0029e-08	1.4406e-23	3.2312e-37	6.491e-23	1.5077e-43	1.4011e-10	1.6372e-43	1.2218e-09	1.767e-20	6.2783e-21	1.1718e-22	1.6777e-07	1.9581e-08
s_B	0.4386	-0.19196	-0.17326	0.1865	0.23623	0.57231	0.62991	0.57682	0.11234	-0.38103	0.17074	-0.038326	0.037939		0.36141	4.243e-12	0.7462	0.5225	0.26072	0.22636	0.60208	0.19502	0.077074	0.86117	0.91615	0.74415	0.41897	0.93629	0.38462	0.017616	0.1702	0.17415	0.29682	0.040151	0.2395
Area_B	0.22446	0.45712	0.44859	-0.096883	0.097904	0.14989	0.10778	0.099902	0.74603	-0.20573	0.71002	0.19012	0.88001	-0.078868		2.2701e-10	0.00063189	8.7711e-05	0.019515	0.0031504	7.8773e-06	0.14113	4.0417e-09	1.5009e-17	4.8674e-24	7.3874e-16	4.8573e-31	2.3281e-10	3.7747e-29	7.2638e-10	2.0805e-20	4.438e-19	3.6853e-20	5.7836e-06	1.3929e-09
CV_B	0.48538	-0.02036	0.09038	-0.12381	0.12457	0.43916	0.49194	0.52711	0.57195	-0.37825	0.51851	0.16793	0.46573	0.54957	0.51		0.74341	0.005172	0.16526	0.049951	0.0086907	0.21639	0.057739	3.2497e-05	0.0001375	0.00027947	5.7153e-08	2.9246e-07	3.7394e-08	1.9044e-05	4.211e-12	1.9167e-10	2.5013e-10	0.00016383	1.9317e-05
H'_B	0.17793	0.16497	0.032713	0.33046	0.19663	0.17599	0.1874	0.013408	0.46636	0.012998	0.26169	-0.025626	0.42055	-0.028006	0.28943	0.028325		1.4354e-06	2.7644e-65	5.1045e-27	9.3622e-15	6.0491e-18	0.67384	0.00033498	2.6205e-08	0.00019372	0.00033159	0.043338	3.7031e-08	7.7252e-05	1.9859e-06	2.3658e-05	2.6589e-08	2.2172e-05	0.010274
Simpson_B	0.24024	0.16643	0.12376	0.046395	0.17138	0.20541	0.24939	0.17434	0.43097	-0.043017	0.34265	0.13857	0.37931	0.055304	0.32991	0.2385	0.39965		0.0036637	2.271e-06	2.625e-07	0.00056006	0.29288	0.0085526	0.00068133	0.030312	4.0417e-05	0.0075744	0.00010756	0.0011455	2.0025e-05	0.00038723	1.338e-07	0.015007	0.13524
Richness_B	-0.0095999	0.23736	0.063812	0.3131	0.096452	0.063143	0.033624	-0.082939	0.30122	0.0081289	0.14675	-0.14014	0.3104	-0.09711	0.20009	-0.11966	0.94176	0.24756		2.2363e-17	2.9468e-10	1.4885e-12	0.72095	0.0087087	5.5116e-06	0.0039645	0.01359	0.38802	2.193e-05	0.011273	0.0030744	0.01619	0.00040016	0.0041718	0.1385
H'_FF	0.30047	0.018667	-0.087849	0.41455	0.33027	0.27353	0.32322	0.17125	0.54158	-0.10807	0.27271	-0.12362	0.35815	0.10442	0.25143	0.16845	0.76161	0.39262	0.64535		1.0807e-10	3.9427e-68	0.53519	0.0052792	1.9835e-05	0.0031894	0.00070636	0.037703	1.1299e-06	1.2124e-05	1.0997e-08	1.0591e-07	3.9269e-11	1.0561e-05	0.0018492
Simpson_FF	0.21711	0.34357	0.27401	0.083086	0.16301	0.23044	0.24817	0.14467	0.47247	-0.12145	0.30126	-0.091951	0.43827	0.045104	0.37271	0.2242	0.60174	0.42436	0.50722	0.51778		0.003255	0.0064375	9.9983e-05	4.2533e-07	0.00019945	3.0296e-06	0.041097	2.8358e-08	0.00083645	9.8487e-09	4.3232e-06	6.601e-09	0.001383	0.016533
Richness_FF	0.24411	-0.12388	-0.20338	0.4401	0.30065	0.18017	0.2463	0.1558	0.43592	-0.079981	0.16887	-0.15497	0.22217	0.1118	0.12685	0.10668	0.65394	0.29207	0.55918	0.94733	0.2506		0.043319	0.11298	0.0051289	0.079189	0.065144	0.15318	0.0011119	0.00012008	1.2857e-05	3.05e-05	2.3269e-07	0.00011742	0.012969
Ammonification	0.12753	0.7893	0.80057	-0.14276	0.033859	0.024523	-0.057009	-0.14884	0.15393	-0.23264	0.090408	-0.054592	0.46694	-0.15212	0.47782	0.16314	-0.036414	0.090845	-0.030907	-0.053631	0.23257	-0.17355		3.0805e-05	1.5287e-05	0.00034181	8.4289e-07	5.5349e-05	7.742e-07	0.83013	0.079281	0.26669	0.15146	0.24084	0.45238
Amines_B	0.22211	0.26561	0.33627	-0.023823	0.1283	0.15937	0.16063	0.093451	0.54122	-0.23219	0.36258	0.088496	0.72629	-0.015136	0.648	0.3483	0.30308	0.22466	0.22414	0.23795	0.3274	0.13653	0.34926		5.4128e-18	2.7545e-08	5.4854e-14	0.21525	9.0137e-20	0.001674	1.157e-06	8.9238e-07	4.4768e-11	1.2175e-05	0.0010631
Aminoacids_B	0.28658	0.33514	0.38785	0.11129	0.14443	0.18631	0.17139	0.0038622	0.63382	-0.12413	0.48276	0.1273	0.83892	-0.0091125	0.73147	0.32119	0.455	0.28776	0.37856	0.35703	0.41753	0.23872	0.36154	0.65466		7.357e-37	1.3408e-35	9.3225e-06	1.1527e-37	2.0191e-06	1.566e-14	5.3922e-14	5.7698e-11	5.4954e-14	5.4405e-14
Carbohydrates_B	0.21716	0.23969	0.25982	0.049491	0.1716	0.22257	0.20254	0.04069	0.56518	-0.038572	0.43718	0.19237	0.71891	0.02824	0.62092	0.30686	0.31435	0.18583	0.24551	0.25112	0.31377	0.15105	0.30266	0.45437	0.83675		7.9659e-28	1.9381e-06	3.8816e-21	6.8707e-06	4.3974e-12	8.3687e-14	8.9088e-06	1.3013e-19	2.6921e-15
Carboxylic acids_B	0.25237	0.34597	0.40176	-0.0050041	0.19895	0.22291	0.19384	0.063053	0.69622	-0.093527	0.58196	0.22778	0.87268	0.069864	0.79625	0.44497	0.3033	0.34436	0.21118	0.28696	0.38812	0.15861	0.4076	0.58759	0.8288	0.76907		2.3127e-08	7.1999e-30	4.6186e-09	1.1655e-16	1.4683e-19	2.984e-15	2.1084e-09	6.5407e-10
Phenolic comp_B	0.3415	0.19688	0.32323	-0.055298	0.11044	0.086303	0.10282	0.020146	0.48265	-0.081974	0.35656	0.28898	0.51508	-0.0069185	0.50973	0.42284	0.17354	0.22807	0.074606	0.17841	0.17541	0.12315	0.33858	0.10695	0.36991	0.39506	0.45658		8.0846e-08	0.00025042	6.8923e-10	4.5228e-09	4.3275e-06	0.018132	7.1045e-06
Polymers_B	0.31042	0.3534	0.36736	0.10798	0.13401	0.28138	0.27784	0.16801	0.69747	-0.24271	0.50289	0.072249	0.87251	0.07514	0.78075	0.45047	0.45059	0.32599	0.35528	0.40325	0.454	0.27667	0.40886	0.67983	0.84161	0.69759	0.7868	0.4404		6.2402e-09	5.8635e-18	2.726e-16	4.9372e-16	2.741e-08	1.284e-06
Amines_F	0.13439	0.0571	0.059232	0.12632	0.18198	0.13993	0.19395	0.28751	0.68271	-0.12321	0.52246	0.088541	0.4916	0.20328	0.4974	0.35774	0.33233	0.27598	0.21671	0.36549	0.28317	0.32385	0.018566	0.26704	0.39444	0.37496	0.47625	0.30913	0.47267		3.1822e-20	8.4752e-20	5.8554e-16	4.6414e-08	1.0914e-06
Aminoacids_F	0.29382	0.11585	0.17339	0.10001	0.19434	0.12374	0.19854	0.19379	0.87466	-0.056224	0.62067	0.19513	0.68919	0.11829	0.68827	0.54964	0.39469	0.35687	0.25205	0.46581	0.46716	0.3645	0.15101	0.40289	0.5977	0.54924	0.63409	0.49798	0.65414	0.68585		1.7798e-36	3.58e-27	1.0694e-11	2.5326e-12
Carbohydrates_F	0.30873	0.018076	0.138	0.048665	0.17859	0.21245	0.25976	0.15419	0.90399	-0.018918	0.69974	0.28898	0.69496	0.11721	0.67032	0.51179	0.35394	0.30002	0.20588	0.43679	0.38248	0.34944	0.09591	0.40676	0.58773	0.5841	0.67696	0.4765	0.62811	0.68019	0.83437		9.9385e-34	1.8935e-11	6.4163e-14
Carboxylic acids_F	0.28085	0.10106	0.10498	0.093021	0.17802	0.18195	0.24811	0.19119	0.91405	-0.0407	0.64603	0.19258	0.71595	0.090109	0.68501	0.50897	0.45482	0.43364	0.29932	0.52808	0.47199	0.42604	0.12367	0.52676	0.5242	0.37067	0.61054	0.38246	0.62385	0.62261	0.76306	0.81621		2.4169e-07	2.1011e-08
Nucleotides_F	0.16509	-0.096429	-0.093089	0.11625	0.20989	0.13894	0.19749	0.18019	0.58217	0.012362	0.37422	0.15094	0.43055	0.17622	0.37778	0.31772	0.35508	0.20819	0.24418	0.36782	0.27157	0.32428	-0.10125	0.36542	0.58757	0.67767	0.48539	0.20238	0.45443	0.44768	0.54082	0.53529	0.42551		3.3727e-16
Polymers_F	0.25687	0.046046	0.089143	-0.053411	0.090115	0.13007	0.15313	0.079384	0.60688	-0.017472	0.54694	0.26692	0.45867	0.10154	0.49012	0.35749	0.21941	0.12874	0.12769	0.26464	0.20524	0.21258	0.064968	0.2777	0.58766	0.61132	0.49856	0.37441	0.40133	0.40377	0.55434	0.5863	0.45779	0.62659
